# Supplementary material for: Engineering a 3D In Vitro Model of Human Gingival Tissue Equivalent with Genipin/Cytochalasin D
Source: MDPI journal article supplement (doi:10.3390/ijms23137401), 2022-07-03
Supplement: s1 [file s1]

## Supplementary Figures

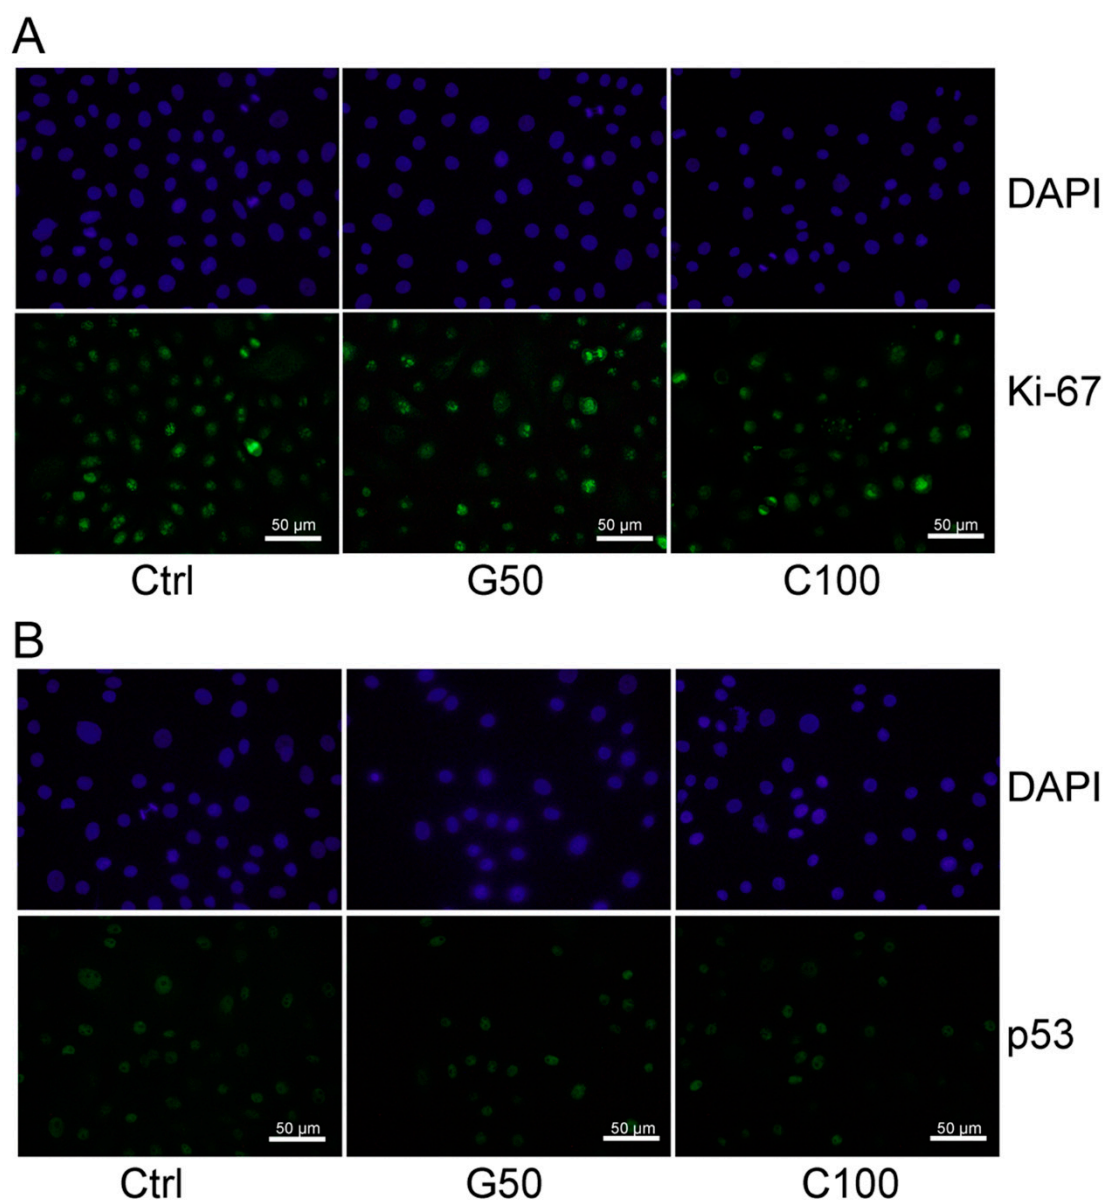

**Supplementary Figure S1.** Immunostaining of the TIGKs with Ki-67 (A) or p53 (B). The PFA-fixed TIGKs were immunostained with anti-Ki67 antibody (Ki-67), or anti-p53 antibody (DO-7) after the cells were treated with 50  $\mu$ M genipin (G50) or 100 nM cytochalasin D (C100) for 48 hours. The cells stained with Ki-67 or p53 show in green colour, while nuclei are stained in blue with DAPI. Ctrl: control (untreated).

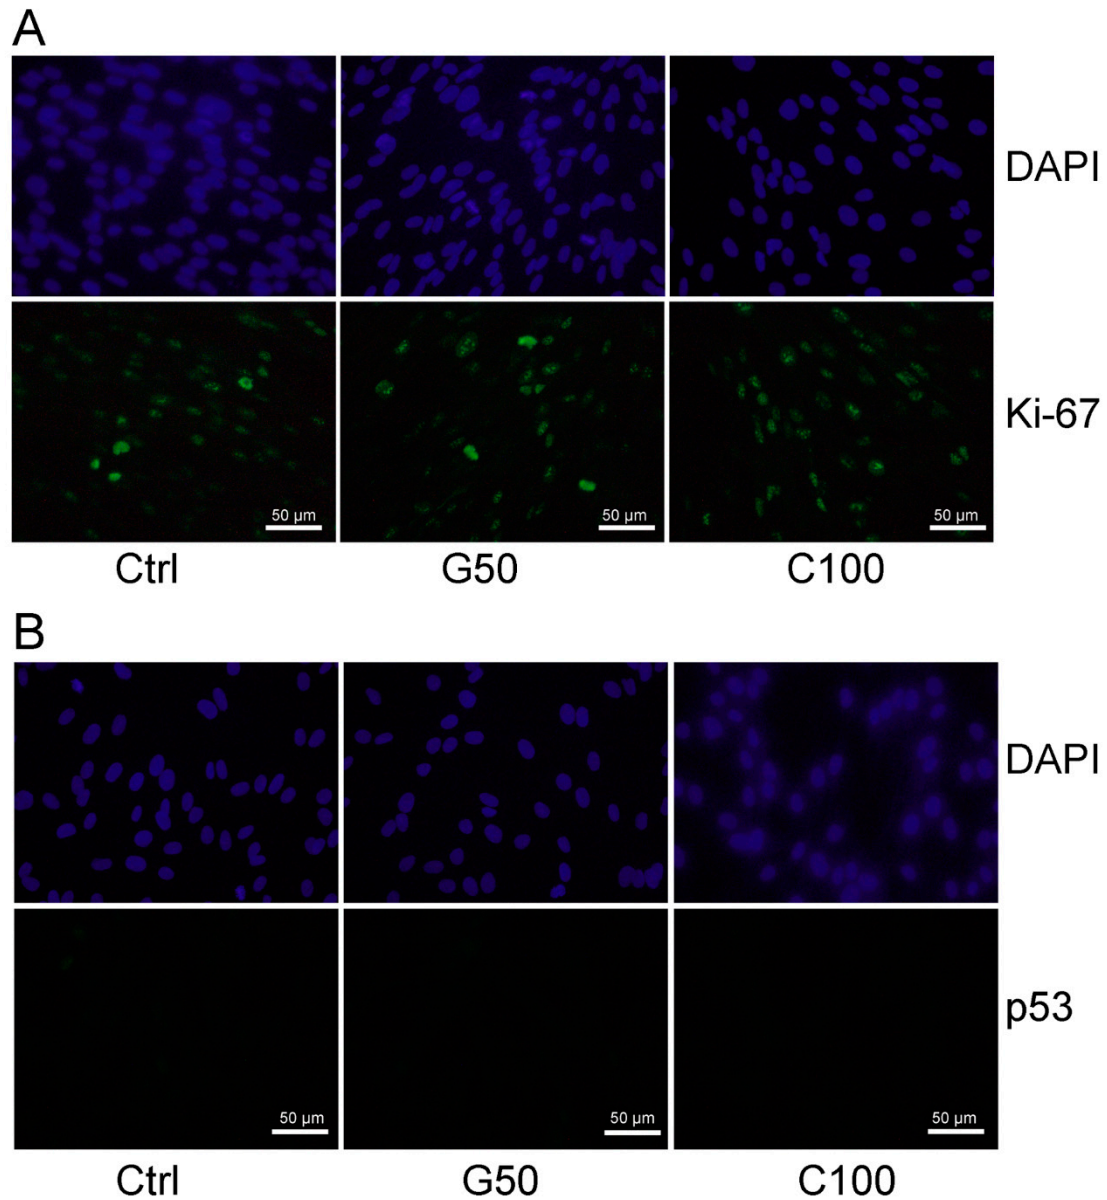

**Supplementary Figure S2.** Immunostaining of the hGFBs with Ki-67 (**A**) or p53 (**B**). The PFA-fixed hGFBs were immunostained with anti-Ki67 antibody (Ki-67), or anti-p53 antibody (DO-7) after the cells were treated with 50  $\mu$ M genipin (G50) or 100 nM cytochalasin D (C100) for 48 hours. The cells stained with Ki-67 or p53 show in green colour, while nuclei are stained in blue with DAPI. Ctrl: control (untreated).

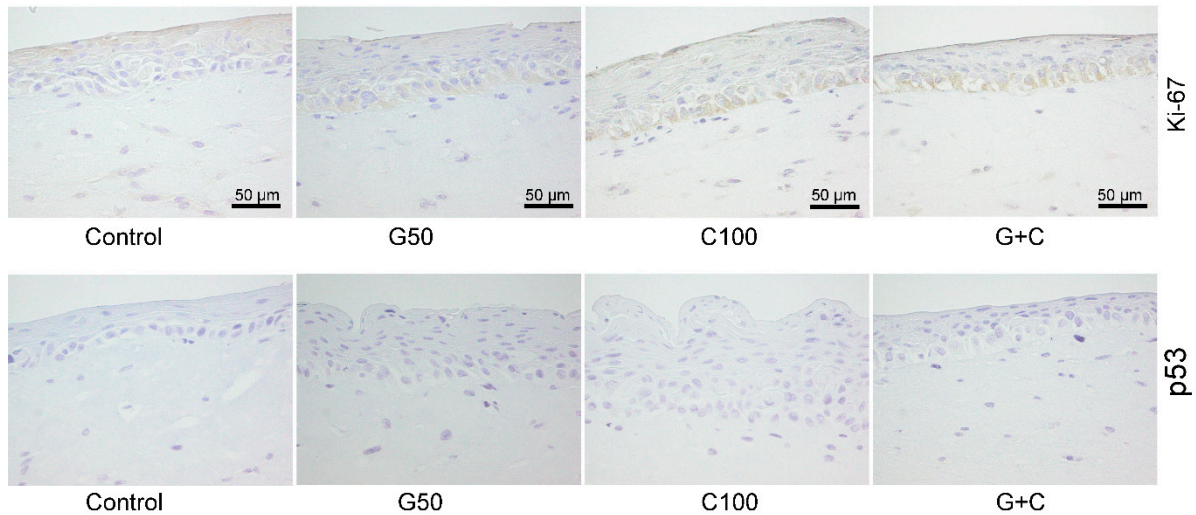

**Supplementary Figure S3.** Immunohistochemical (IHC) staining of Ki-67 and p53 in the human 3D gingival tissue equivalents (GTEs) generated with the TIGKs and the hGFBs-populated collagen gel with/without genipin/cytochalasin D directly crosslinking for 2-week air-liquid interface culture. Control: uncrosslinked 3D GTE; G50: 50  $\mu$ M genipin; C100: 100 nM cytochalasin D; G+C: G50 + C100.

**Supplementary Table S1.** Significant p values of the hGFB size from multiple comparison between groups after the cells were treated with different concentrations of cytochalasin D in 2D monolayer culture.

| Groups | Ctrl    | C50     | C100    | C200  | C400  | C800    |
|--------|---------|---------|---------|-------|-------|---------|
| Ctrl   |         | ns      | ns      | 0.008 | 0.034 | < 0.001 |
| C50    | ns      |         | ns      | 0.001 | 0.004 | < 0.001 |
| C100   | ns      | ns      |         | 0.004 | 0.020 | < 0.001 |
| C200   | 0.008   | 0.001   | 0.004   |       | ns    | ns      |
| C400   | 0.034   | 0.004   | 0.020   | ns    |       | 0.01    |
| C800   | < 0.001 | < 0.001 | < 0.001 | ns    | 0.01  |         |

Ctrl: control; C50: 50 nM cytochalasin D; C100: 100 nM cytochalasin D; C200: 200 nM cytochalasin D; C400: 400 nM cytochalasin D; C800: 800 nM cytochalasin D.
